# Supplementary material
Source: publisher figshare collection journal article supplement (https://acs.figshare.com/ndownloader/files/5318569)
Supplement: Supplementary file 1 [file 5318569]

 
data_threo12l 
 
_audit_creation_method            SHELXL-97 
_chemical_name_systematic 
; 
(R*)-2-((S*)-5,5-bis(4-fluorophenyl)-3-methyl-2-oxooxazolidin-4-yl)-2-
fluoro-N-methylacetamide
; 
_chemical_name_common             ? 
_chemical_melting_point           494-495 
_chemical_formula_moiety          'C19 H17 F3 N2 O3' 
_chemical_formula_sum 
 'C19 H17 F3 N2 O3' 
_chemical_formula_weight          378.35 
 
loop_ 
 _atom_type_symbol 
 _atom_type_description 
 _atom_type_scat_dispersion_real 
 _atom_type_scat_dispersion_imag 
 _atom_type_scat_source 
 'C'  'C'   0.0033   0.0016 
 'International Tables Vol C Tables 4.2.6.8 and 6.1.1.4' 
 'H'  'H'   0.0000   0.0000 
 'International Tables Vol C Tables 4.2.6.8 and 6.1.1.4' 
 'N'  'N'   0.0061   0.0033 
 'International Tables Vol C Tables 4.2.6.8 and 6.1.1.4' 
 'O'  'O'   0.0106   0.0060 
 'International Tables Vol C Tables 4.2.6.8 and 6.1.1.4' 
 'F'  'F'   0.0171   0.0103 
 'International Tables Vol C Tables 4.2.6.8 and 6.1.1.4' 
 
_symmetry_cell_setting            monoclinic 
_symmetry_space_group_name_H-M    'P 21/a'
_symmetry_space_group_name_Hall   '-P 2yab'
 
loop_ 
 _symmetry_equiv_pos_as_xyz 
 'x, y, z' 
 '-x+1/2, y+1/2, -z' 
 '-x, -y, -z' 
 'x-1/2, -y-1/2, z' 
 
_cell_length_a                    8.394(3) 
_cell_length_b                    24.341(7) 
_cell_length_c                    9.028(3) 
_cell_angle_alpha                 90.00 
_cell_angle_beta                  84.55(3) 
_cell_angle_gamma                 90.00 
_cell_volume                      1836.2(10) 
_cell_formula_units_Z             4 
_cell_measurement_temperature     298(2) 
_cell_measurement_reflns_used     16541
_cell_measurement_theta_min       3.2
_cell_measurement_theta_max       27.6 
 
_exptl_crystal_description        'block' 
_exptl_crystal_colour             'colorless' 
_exptl_crystal_size_max           0.50 
_exptl_crystal_size_mid           0.50 
_exptl_crystal_size_min           0.25 
_exptl_crystal_density_meas       ? 
_exptl_crystal_density_diffrn     1.369 
_exptl_crystal_density_method     'not measured' 
_exptl_crystal_F_000              784 
_exptl_absorpt_coefficient_mu     0.113 
_exptl_absorpt_correction_type    multi-scan 
_exptl_absorpt_correction_T_min   0.9455 
_exptl_absorpt_correction_T_max   0.9722 
_exptl_absorpt_process_details    
;
    Higashi, T. (1995). Program for Absorption Correction.
    Rigaku Corporation, Tokyo, Japan.
;
 
_diffrn_ambient_temperature       298(2) 
_diffrn_radiation_wavelength      0.71075 
_diffrn_radiation_type            MoK\a 
_diffrn_radiation_source          'fine-focus sealed tube' 
_diffrn_radiation_monochromator   graphite 
_diffrn_measurement_device_type   'Rigaku RAXIS-RAPID'
_diffrn_measurement_method        \w
_diffrn_detector_area_resol_mean  10.00
_diffrn_standards_number          ? 
_diffrn_standards_interval_count  ? 
_diffrn_standards_interval_time   ? 
_diffrn_standards_decay_%         ? 
_diffrn_reflns_number             17848 
_diffrn_reflns_av_R_equivalents   0.0419 
_diffrn_reflns_av_sigmaI/netI     0.0312 
_diffrn_reflns_limit_h_min        -10 
_diffrn_reflns_limit_h_max        10 
_diffrn_reflns_limit_k_min        -31 
_diffrn_reflns_limit_k_max        31 
_diffrn_reflns_limit_l_min        -11 
_diffrn_reflns_limit_l_max        11 
_diffrn_reflns_theta_min          3.28 
_diffrn_reflns_theta_max          27.48 
_reflns_number_total              4200 
_reflns_number_gt                 3192 
_reflns_threshold_expression      >2sigma(I) 
 
_computing_data_collection        'PROCESS-AUTO'
_computing_cell_refinement        'PROCESS-AUTO'
_computing_data_reduction         'PROCESS-AUTO'
_computing_structure_solution     'SHELXS-97 (Sheldrick, 1990)' 
_computing_structure_refinement   'SHELXL-97 (Sheldrick, 1997)' 
_computing_molecular_graphics     ? 
_computing_publication_material   'yadokari-XG'
 
_refine_special_details 
; 
 Refinement of F^2^ against ALL reflections.  The weighted R-factor wR and 
 goodness of fit S are based on F^2^, conventional R-factors R are based 
 on F, with F set to zero for negative F^2^. The threshold expression of 
 F^2^ > 2sigma(F^2^) is used only for calculating R-factors(gt) etc. and is 
 not relevant to the choice of reflections for refinement.  R-factors based 
 on F^2^ are statistically about twice as large as those based on F, and R- 
 factors based on ALL data will be even larger. 
; 
 
_refine_ls_structure_factor_coef  Fsqd  
_refine_ls_matrix_type            full 
_refine_ls_weighting_scheme       calc  
_refine_ls_weighting_details 
 'calc w=1/[\s^2^(Fo^2^)+(0.0594P)^2^+0.3496P] where P=(Fo^2^+2Fc^2^)/3' 
_atom_sites_solution_primary      direct 
_atom_sites_solution_secondary    difmap 
_atom_sites_solution_hydrogens    geom 
_refine_ls_hydrogen_treatment     refall 
_refine_ls_extinction_method      none 
_refine_ls_extinction_coef        ? 
_refine_ls_number_reflns          4200 
_refine_ls_number_parameters      250 
_refine_ls_number_restraints      0 
_refine_ls_R_factor_all           0.0687 
_refine_ls_R_factor_gt            0.0495 
_refine_ls_wR_factor_ref          0.1295 
_refine_ls_wR_factor_gt           0.1210 
_refine_ls_goodness_of_fit_ref    1.059 
_refine_ls_restrained_S_all       1.059 
_refine_ls_shift/su_max           0.001 
_refine_ls_shift/su_mean          0.000 
 
loop_ 
 _atom_site_label 
 _atom_site_type_symbol 
 _atom_site_fract_x 
 _atom_site_fract_y 
 _atom_site_fract_z 
 _atom_site_U_iso_or_equiv 
 _atom_site_adp_type 
 _atom_site_occupancy 
 _atom_site_symmetry_multiplicity 
 _atom_site_calc_flag 
 _atom_site_refinement_flags 
 _atom_site_disorder_assembly 
 _atom_site_disorder_group 
O1 O 0.20086(13) 0.38283(5) 0.39680(11) 0.0472(3) Uani 1 1 d . . . 
C1 C 0.2033(2) 0.43080(8) 0.47398(19) 0.0555(4) Uani 1 1 d . . . 
O2 O 0.1376(2) 0.43582(7) 0.59785(15) 0.0876(5) Uani 1 1 d . . . 
N1 N 0.28850(18) 0.46863(6) 0.39146(16) 0.0520(4) Uani 1 1 d . . . 
C2 C 0.3079(3) 0.52477(8) 0.4436(3) 0.0807(7) Uani 1 1 d . . . 
H1 H 0.2133 0.5456 0.4298 0.121 Uiso 1 1 calc R . . 
H2 H 0.3984 0.5414 0.3879 0.121 Uiso 1 1 calc R . . 
H3 H 0.3247 0.5243 0.5473 0.121 Uiso 1 1 calc R . . 
C3 C 0.32771(18) 0.44914(6) 0.23999(16) 0.0400(3) Uani 1 1 d . . . 
H4 H 0.4358 0.4609 0.2028 0.048 Uiso 1 1 calc R . . 
C4 C 0.2063(2) 0.46925(6) 0.13627(18) 0.0465(4) Uani 1 1 d . . . 
H5 H 0.2257 0.4497 0.0413 0.056 Uiso 1 1 calc R . . 
F1 F 0.05191(12) 0.45661(4) 0.19849(13) 0.0651(3) Uani 1 1 d . . . 
C5 C 0.2228(2) 0.53041(7) 0.10649(18) 0.0482(4) Uani 1 1 d . . . 
O3 O 0.34898(17) 0.54677(5) 0.04246(17) 0.0742(4) Uani 1 1 d . . . 
N2 N 0.1000(2) 0.56213(6) 0.15176(17) 0.0557(4) Uani 1 1 d . . . 
C6 C 0.1070(3) 0.62162(8) 0.1363(3) 0.0859(7) Uani 1 1 d . . . 
H6 H 0.2107 0.6344 0.1573 0.129 Uiso 1 1 calc R . . 
H7 H 0.0264 0.6381 0.2048 0.129 Uiso 1 1 calc R . . 
H8 H 0.0886 0.6316 0.0364 0.129 Uiso 1 1 calc R . . 
C7 C 0.32530(17) 0.38632(6) 0.27271(15) 0.0365(3) Uani 1 1 d . . . 
C8 C 0.48124(18) 0.36593(6) 0.33030(15) 0.0367(3) Uani 1 1 d . . . 
C9 C 0.63083(19) 0.38198(6) 0.26762(18) 0.0462(4) Uani 1 1 d . . . 
H9 H 0.6389 0.4068 0.1889 0.055 Uiso 1 1 calc R . . 
C10 C 0.7689(2) 0.36158(7) 0.3204(2) 0.0531(4) Uani 1 1 d . . . 
H10 H 0.8693 0.3728 0.2789 0.064 Uiso 1 1 calc R . . 
C11 C 0.7541(2) 0.32468(7) 0.43501(19) 0.0513(4) Uani 1 1 d . . . 
F2 F 0.88871(14) 0.30475(5) 0.48876(14) 0.0765(4) Uani 1 1 d . . . 
C12 C 0.6088(2) 0.30635(8) 0.4968(2) 0.0603(5) Uani 1 1 d . . . 
H11 H 0.6021 0.2803 0.5725 0.072 Uiso 1 1 calc R . . 
C13 C 0.4725(2) 0.32739(7) 0.44442(18) 0.0527(4) Uani 1 1 d . . . 
H12 H 0.3728 0.3156 0.4862 0.063 Uiso 1 1 calc R . . 
C14 C 0.28148(18) 0.34908(6) 0.14888(16) 0.0380(3) Uani 1 1 d . . . 
C15 C 0.3595(2) 0.35484(7) 0.00670(17) 0.0495(4) Uani 1 1 d . . . 
H13 H 0.4336 0.3829 -0.0131 0.059 Uiso 1 1 calc R . . 
C16 C 0.3268(3) 0.31877(8) -0.1056(2) 0.0654(5) Uani 1 1 d . . . 
H14 H 0.3770 0.3227 -0.2014 0.078 Uiso 1 1 calc R . . 
C17 C 0.2191(3) 0.27734(8) -0.0721(2) 0.0708(6) Uani 1 1 d . . . 
F3 F 0.1897(2) 0.24202(6) -0.18322(17) 0.1166(6) Uani 1 1 d . . . 
C18 C 0.1426(3) 0.26980(8) 0.0657(3) 0.0684(6) Uani 1 1 d . . . 
H15 H 0.0710 0.2409 0.0845 0.082 Uiso 1 1 calc R . . 
C19 C 0.1734(2) 0.30610(6) 0.1775(2) 0.0507(4) Uani 1 1 d . . . 
H16 H 0.1216 0.3018 0.2725 0.061 Uiso 1 1 calc R . . 
H17 H 0.024(3) 0.5476(8) 0.206(2) 0.060(6) Uiso 1 1 d . . . 
 
loop_ 
 _atom_site_aniso_label 
 _atom_site_aniso_U_11 
 _atom_site_aniso_U_22 
 _atom_site_aniso_U_33 
 _atom_site_aniso_U_23 
 _atom_site_aniso_U_13 
 _atom_site_aniso_U_12 
O1 0.0444(6) 0.0537(6) 0.0409(5) -0.0003(5) 0.0095(5) -0.0003(5) 
C1 0.0539(10) 0.0681(11) 0.0435(8) -0.0106(8) 0.0000(7) 0.0167(9) 
O2 0.0960(12) 0.1134(13) 0.0485(7) -0.0148(8) 0.0191(7) 0.0294(9) 
N1 0.0579(9) 0.0457(7) 0.0526(8) -0.0171(6) -0.0066(7) 0.0064(6) 
C2 0.1063(18) 0.0533(11) 0.0887(15) -0.0317(11) -0.0411(13) 0.0190(11) 
C3 0.0399(8) 0.0344(7) 0.0451(8) -0.0040(6) -0.0009(6) 0.0002(6) 
C4 0.0473(9) 0.0418(8) 0.0499(8) 0.0015(7) -0.0014(7) 0.0023(7) 
F1 0.0445(6) 0.0602(6) 0.0915(8) 0.0198(6) -0.0109(5) -0.0079(4) 
C5 0.0492(10) 0.0459(8) 0.0477(9) 0.0076(7) 0.0049(7) 0.0068(7) 
O3 0.0622(9) 0.0609(8) 0.0928(10) 0.0253(7) 0.0268(7) 0.0074(6) 
N2 0.0564(9) 0.0483(8) 0.0597(9) 0.0101(7) 0.0081(7) 0.0124(7) 
C6 0.1015(18) 0.0495(11) 0.1026(17) 0.0132(11) 0.0116(14) 0.0255(11) 
C7 0.0389(8) 0.0359(7) 0.0333(7) -0.0009(6) 0.0035(6) -0.0016(6) 
C8 0.0424(8) 0.0337(7) 0.0333(6) -0.0048(5) -0.0005(6) -0.0015(6) 
C9 0.0443(9) 0.0415(8) 0.0508(9) 0.0076(7) 0.0051(7) 0.0015(7) 
C10 0.0417(9) 0.0484(9) 0.0679(11) 0.0034(8) 0.0020(8) 0.0012(7) 
C11 0.0496(10) 0.0522(9) 0.0538(9) -0.0026(8) -0.0126(8) 0.0081(7) 
F2 0.0567(7) 0.0882(8) 0.0872(8) 0.0144(7) -0.0202(6) 0.0143(6) 
C12 0.0608(12) 0.0696(12) 0.0512(10) 0.0199(9) -0.0079(8) 0.0011(9) 
C13 0.0472(10) 0.0631(10) 0.0473(9) 0.0155(8) -0.0026(7) -0.0054(8) 
C14 0.0393(8) 0.0333(7) 0.0419(7) -0.0020(6) -0.0065(6) 0.0035(6) 
C15 0.0538(10) 0.0511(9) 0.0429(8) -0.0058(7) -0.0012(7) 0.0026(7) 
C16 0.0774(14) 0.0750(13) 0.0444(9) -0.0162(9) -0.0097(9) 0.0194(11) 
C17 0.0858(15) 0.0565(11) 0.0761(14) -0.0276(10) -0.0387(12) 0.0106(10) 
F3 0.1523(15) 0.1015(10) 0.1043(11) -0.0595(9) -0.0560(10) 0.0049(10) 
C18 0.0764(14) 0.0479(10) 0.0855(14) -0.0083(10) -0.0314(11) -0.0109(9) 
C19 0.0511(10) 0.0431(8) 0.0595(10) 0.0016(7) -0.0126(8) -0.0051(7) 
 
_geom_special_details 
; 
 All esds (except the esd in the dihedral angle between two l.s. planes) 
 are estimated using the full covariance matrix.  The cell esds are taken 
 into account individually in the estimation of esds in distances, angles 
 and torsion angles; correlations between esds in cell parameters are only 
 used when they are defined by crystal symmetry.  An approximate (isotropic) 
 treatment of cell esds is used for estimating esds involving l.s. planes. 
; 
 
loop_ 
 _geom_bond_atom_site_label_1 
 _geom_bond_atom_site_label_2 
 _geom_bond_distance 
 _geom_bond_site_symmetry_2 
 _geom_bond_publ_flag 
O1 C1 1.361(2) . ? 
O1 C7 1.4598(17) . ? 
C1 O2 1.205(2) . ? 
C1 N1 1.347(2) . ? 
N1 C3 1.455(2) . ? 
N1 C2 1.459(2) . ? 
C2 H1 0.9600 . ? 
C2 H2 0.9600 . ? 
C2 H3 0.9600 . ? 
C3 C4 1.528(2) . ? 
C3 C7 1.5571(19) . ? 
C3 H4 0.9800 . ? 
C4 F1 1.397(2) . ? 
C4 C5 1.517(2) . ? 
C4 H5 0.9800 . ? 
C5 O3 1.224(2) . ? 
C5 N2 1.322(2) . ? 
N2 C6 1.455(2) . ? 
N2 H17 0.84(2) . ? 
C6 H6 0.9600 . ? 
C6 H7 0.9600 . ? 
C6 H8 0.9600 . ? 
C7 C14 1.511(2) . ? 
C7 C8 1.536(2) . ? 
C8 C9 1.384(2) . ? 
C8 C13 1.390(2) . ? 
C9 C10 1.386(2) . ? 
C9 H9 0.9300 . ? 
C10 C11 1.367(2) . ? 
C10 H10 0.9300 . ? 
C11 F2 1.361(2) . ? 
C11 C12 1.367(3) . ? 
C12 C13 1.378(3) . ? 
C12 H11 0.9300 . ? 
C13 H12 0.9300 . ? 
C14 C15 1.391(2) . ? 
C14 C19 1.393(2) . ? 
C15 C16 1.388(2) . ? 
C15 H13 0.9300 . ? 
C16 C17 1.369(3) . ? 
C16 H14 0.9300 . ? 
C17 C18 1.357(3) . ? 
C17 F3 1.361(2) . ? 
C18 C19 1.385(3) . ? 
C18 H15 0.9300 . ? 
C19 H16 0.9300 . ? 
 
loop_ 
 _geom_angle_atom_site_label_1 
 _geom_angle_atom_site_label_2 
 _geom_angle_atom_site_label_3 
 _geom_angle 
 _geom_angle_site_symmetry_1 
 _geom_angle_site_symmetry_3 
 _geom_angle_publ_flag 
C1 O1 C7 107.37(12) . . ? 
O2 C1 N1 128.04(18) . . ? 
O2 C1 O1 122.29(19) . . ? 
N1 C1 O1 109.67(13) . . ? 
C1 N1 C3 110.96(13) . . ? 
C1 N1 C2 122.12(16) . . ? 
C3 N1 C2 125.88(16) . . ? 
N1 C2 H1 109.5 . . ? 
N1 C2 H2 109.5 . . ? 
H1 C2 H2 109.5 . . ? 
N1 C2 H3 109.5 . . ? 
H1 C2 H3 109.5 . . ? 
H2 C2 H3 109.5 . . ? 
N1 C3 C4 111.52(13) . . ? 
N1 C3 C7 98.30(11) . . ? 
C4 C3 C7 115.68(12) . . ? 
N1 C3 H4 110.3 . . ? 
C4 C3 H4 110.3 . . ? 
C7 C3 H4 110.3 . . ? 
F1 C4 C5 110.66(13) . . ? 
F1 C4 C3 109.28(13) . . ? 
C5 C4 C3 111.59(13) . . ? 
F1 C4 H5 108.4 . . ? 
C5 C4 H5 108.4 . . ? 
C3 C4 H5 108.4 . . ? 
O3 C5 N2 124.79(16) . . ? 
O3 C5 C4 117.61(14) . . ? 
N2 C5 C4 117.60(15) . . ? 
C5 N2 C6 121.89(17) . . ? 
C5 N2 H17 117.3(13) . . ? 
C6 N2 H17 119.7(13) . . ? 
N2 C6 H6 109.5 . . ? 
N2 C6 H7 109.5 . . ? 
H6 C6 H7 109.5 . . ? 
N2 C6 H8 109.5 . . ? 
H6 C6 H8 109.5 . . ? 
H7 C6 H8 109.5 . . ? 
O1 C7 C14 109.03(12) . . ? 
O1 C7 C8 106.99(11) . . ? 
C14 C7 C8 109.37(11) . . ? 
O1 C7 C3 101.43(11) . . ? 
C14 C7 C3 116.63(12) . . ? 
C8 C7 C3 112.67(12) . . ? 
C9 C8 C13 118.40(14) . . ? 
C9 C8 C7 122.67(13) . . ? 
C13 C8 C7 118.83(13) . . ? 
C8 C9 C10 120.93(15) . . ? 
C8 C9 H9 119.5 . . ? 
C10 C9 H9 119.5 . . ? 
C11 C10 C9 118.48(16) . . ? 
C11 C10 H10 120.8 . . ? 
C9 C10 H10 120.8 . . ? 
F2 C11 C10 119.04(16) . . ? 
F2 C11 C12 118.48(16) . . ? 
C10 C11 C12 122.48(16) . . ? 
C11 C12 C13 118.44(16) . . ? 
C11 C12 H11 120.8 . . ? 
C13 C12 H11 120.8 . . ? 
C12 C13 C8 121.22(16) . . ? 
C12 C13 H12 119.4 . . ? 
C8 C13 H12 119.4 . . ? 
C15 C14 C19 119.21(14) . . ? 
C15 C14 C7 119.72(13) . . ? 
C19 C14 C7 120.86(13) . . ? 
C16 C15 C14 120.14(17) . . ? 
C16 C15 H13 119.9 . . ? 
C14 C15 H13 119.9 . . ? 
C17 C16 C15 118.45(18) . . ? 
C17 C16 H14 120.8 . . ? 
C15 C16 H14 120.8 . . ? 
C18 C17 F3 119.1(2) . . ? 
C18 C17 C16 123.19(17) . . ? 
F3 C17 C16 117.7(2) . . ? 
C17 C18 C19 118.49(18) . . ? 
C17 C18 H15 120.8 . . ? 
C19 C18 H15 120.8 . . ? 
C18 C19 C14 120.50(18) . . ? 
C18 C19 H16 119.7 . . ? 
C14 C19 H16 119.7 . . ? 
 
loop_ 
 _geom_torsion_atom_site_label_1 
 _geom_torsion_atom_site_label_2 
 _geom_torsion_atom_site_label_3 
 _geom_torsion_atom_site_label_4 
 _geom_torsion 
 _geom_torsion_site_symmetry_1 
 _geom_torsion_site_symmetry_2 
 _geom_torsion_site_symmetry_3 
 _geom_torsion_site_symmetry_4 
 _geom_torsion_publ_flag 
C7 O1 C1 O2 -164.58(18) . . . . ? 
C7 O1 C1 N1 14.90(18) . . . . ? 
O2 C1 N1 C3 -171.41(19) . . . . ? 
O1 C1 N1 C3 9.16(19) . . . . ? 
O2 C1 N1 C2 -2.5(3) . . . . ? 
O1 C1 N1 C2 178.08(16) . . . . ? 
C1 N1 C3 C4 95.08(16) . . . . ? 
C2 N1 C3 C4 -73.3(2) . . . . ? 
C1 N1 C3 C7 -26.81(16) . . . . ? 
C2 N1 C3 C7 164.78(17) . . . . ? 
N1 C3 C4 F1 -51.59(17) . . . . ? 
C7 C3 C4 F1 59.61(16) . . . . ? 
N1 C3 C4 C5 71.13(17) . . . . ? 
C7 C3 C4 C5 -177.67(12) . . . . ? 
F1 C4 C5 O3 -175.08(16) . . . . ? 
C3 C4 C5 O3 63.0(2) . . . . ? 
F1 C4 C5 N2 5.0(2) . . . . ? 
C3 C4 C5 N2 -116.93(17) . . . . ? 
O3 C5 N2 C6 -3.5(3) . . . . ? 
C4 C5 N2 C6 176.41(18) . . . . ? 
C1 O1 C7 C14 -154.21(12) . . . . ? 
C1 O1 C7 C8 87.62(14) . . . . ? 
C1 O1 C7 C3 -30.61(15) . . . . ? 
N1 C3 C7 O1 33.14(13) . . . . ? 
C4 C3 C7 O1 -85.64(14) . . . . ? 
N1 C3 C7 C14 151.40(12) . . . . ? 
C4 C3 C7 C14 32.62(18) . . . . ? 
N1 C3 C7 C8 -80.91(14) . . . . ? 
C4 C3 C7 C8 160.31(12) . . . . ? 
O1 C7 C8 C9 -154.72(13) . . . . ? 
C14 C7 C8 C9 87.33(16) . . . . ? 
C3 C7 C8 C9 -44.10(18) . . . . ? 
O1 C7 C8 C13 29.04(17) . . . . ? 
C14 C7 C8 C13 -88.91(16) . . . . ? 
C3 C7 C8 C13 139.66(14) . . . . ? 
C13 C8 C9 C10 -2.1(2) . . . . ? 
C7 C8 C9 C10 -178.37(14) . . . . ? 
C8 C9 C10 C11 0.7(3) . . . . ? 
C9 C10 C11 F2 -179.39(15) . . . . ? 
C9 C10 C11 C12 1.5(3) . . . . ? 
F2 C11 C12 C13 178.69(16) . . . . ? 
C10 C11 C12 C13 -2.2(3) . . . . ? 
C11 C12 C13 C8 0.7(3) . . . . ? 
C9 C8 C13 C12 1.4(3) . . . . ? 
C7 C8 C13 C12 177.81(16) . . . . ? 
O1 C7 C14 C15 164.66(13) . . . . ? 
C8 C7 C14 C15 -78.67(16) . . . . ? 
C3 C7 C14 C15 50.62(19) . . . . ? 
O1 C7 C14 C19 -20.62(19) . . . . ? 
C8 C7 C14 C19 96.04(16) . . . . ? 
C3 C7 C14 C19 -134.67(15) . . . . ? 
C19 C14 C15 C16 1.4(2) . . . . ? 
C7 C14 C15 C16 176.20(15) . . . . ? 
C14 C15 C16 C17 -1.1(3) . . . . ? 
C15 C16 C17 C18 0.0(3) . . . . ? 
C15 C16 C17 F3 -179.37(17) . . . . ? 
F3 C17 C18 C19 -179.87(18) . . . . ? 
C16 C17 C18 C19 0.7(3) . . . . ? 
C17 C18 C19 C14 -0.4(3) . . . . ? 
C15 C14 C19 C18 -0.6(2) . . . . ? 
C7 C14 C19 C18 -175.37(15) . . . . ? 
 
_diffrn_measured_fraction_theta_max    0.995 
_diffrn_reflns_theta_full              27.48 
_diffrn_measured_fraction_theta_full   0.995 
_refine_diff_density_max    0.204 
_refine_diff_density_min   -0.199 
_refine_diff_density_rms    0.037 
